# Supplementary material
Source: publisher site journal article supplement (https://oneecosystem.pensoft.net/article/download/suppl/5011973/)
Supplement: Supplementary file 1

**Table 1. Selected publications for this review and their interrelationship between social network (SN) aspects and cultural ecosystem services (CES).**

| List             | Author                                             | SNA and interrelationship                                                                   | CES | Cultural context                                        | Region                                    | Journal                     |
|------------------|----------------------------------------------------|---------------------------------------------------------------------------------------------|-----|---------------------------------------------------------|-------------------------------------------|-----------------------------|
| <b>Fisheries</b> |                                                    |                                                                                             |     |                                                         |                                           |                             |
| 1                | (Mertens et al., 2015)                             | Presence of river led to strong SN formed during the fishing activities                     |     | Fish resources in the riverine                          | Brazil                                    | E&S                         |
| 2                | (Marín & Berkes, 2010)                             | Artisanal fishers' role in conservation of endangered fish species.                         |     | Coastal bay/strip,                                      | Chile                                     | Marine policy               |
| 3                | (Turner, Polunin, & Stead, 2014)                   | Fishers' behaviour and their impact on fish overexploitation through Social process created |     | Coastal inshore fishing                                 | Northumberland, UK                        | E&S                         |
| 4                | (Barnes-Mauthe, Arita, Allen, Gray, & Leung, 2013) | Ethnicity diversity in SN in a common pool resource                                         |     | Hawaii long line fishery                                | Hawaii 2013                               | E&S                         |
| 5                | Rosas et al., 2013                                 | Economic performance through fishermen organised social networks                            |     | Coastal strip                                           | Chile 2013                                | Ocean & costal management   |
| 6                | (Stevens, Frank, & Kramer, 2015)                   | Social networks of Friends and fishing partners                                             |     | Pearl lagoon estuary                                    | Nicaragua's Atlantic Coast. Caribbean Sea | PLOS ONE                    |
| 7                | (Cox, Wilson, & Pavlowich, 2016)                   | Social networks structure that fishermen co-create the "cofishing" network                  |     | Northern coast-coral reef, seagrass and mangrove lining | Dominican Republic                        | Marine policy               |
| 8                | (Alexander, Armitage, & Charles, 2015)             | Relational ties created in special fisheries conservation areas                             |     | Coastal marine systems/coral reefs                      | Caribbean islands in Jamaica              | Global Environmental Change |
| 9                | (Cohen, Evans, & Mills, 2012)                      | Governance and conservation through existing social networks                                |     | Coastal ecosystems                                      | Solomon Islands                           | Conservation Letters        |
| 10               | (Kocho-Schellenberg & Berkes, 2014)                | Co-management of the Begula whales through communication networks                           |     | Begula whale in the ocean                               | Canada                                    | Cambridge University Press  |

|    |                                                                              |                                                                                                                                  |                                                                        |                                                                                   |                                              |
|----|------------------------------------------------------------------------------|----------------------------------------------------------------------------------------------------------------------------------|------------------------------------------------------------------------|-----------------------------------------------------------------------------------|----------------------------------------------|
| 11 | (Paterson, 2015)                                                             | Skippers social networks use in fishing location preferences                                                                     | Namibian waters/Walvis Bay                                             | Namibia                                                                           | Marine Policy                                |
| 12 | (Sandström & Rova, 2010)                                                     | Relationship between certain types of co-management social networks and potential adaptability                                   | Fishery conservation areas in the inland waters of Sweden              | Sweden                                                                            | E&S                                          |
| 13 | (Pietri, Stevenson, & Christie, 2015)                                        | Social capital in the learning network that emerged through large-scale marine governance                                        | Coral triangle initiative on coral reefs, fisheries, and food security | Indonesia, Malaysia, Papua New Guinea, Philippines, Solomon Islands & Timor Leste | Global Environmental Change                  |
| 14 | (Stoll, 2017)                                                                | Leaders identification through SNA of fishers in a rural coastal region as a result of ecosystem availability                    | The inshore waters of the Eastern Maine Coastal Current                | United States.                                                                    | Journal of Environmental Management          |
| 15 | (Díaz-Reviriego, Fernández-Llamazares, Howard, Molina, & Reyes-García, 2017) | Association between fishing networks and demographic identities. Fishing networks are gendered                                   | Tsimane' people living along Maniqui and Quiquibey rivers              | Bolivian Amazonia                                                                 | Society & natural resources                  |
| 16 | (Kilonzi et al. 2017)                                                        | Role of SNA in improving fisheries management                                                                                    | Central Kalimantan                                                     | Indonesia                                                                         | Journal of Ecosystem & Ecography             |
| 17 | (Chan et al., 2012)                                                          | The identity and sense of belonging derived from ownership of a boat and a fishing license by the fishermen as an important CES. | A framework for understanding cultural and social ecosystem services   | Waddington, in British Columbia, Canada.                                          | BioScience                                   |
| 18 | (Uehara, Sakurai, & Tsuge, 2018)                                             | The role of Satoumi (Japanese coastal social-ecological production landscape in ocean literacy                                   | A study on Satoumi                                                     | Hinase district, Okayama, Japan                                                   | Environment, Development and Sustainability. |

|                    |                                                         |                                                                                                  |                                                                             |                  |                                                      |
|--------------------|---------------------------------------------------------|--------------------------------------------------------------------------------------------------|-----------------------------------------------------------------------------|------------------|------------------------------------------------------|
| 19                 | (Ö. Bodin & Crona, 2008)                                | Using social network aspects in conservation of the marine resources                             | Loreto Bay National Marine Park                                             | Mexico           | Cambridge                                            |
| 20                 | (O. Bodin, 2011)                                        | Social relations and the human actions in natural resource management                            | Kenyan fishing village                                                      | Kenya            | Cambridge                                            |
| <b>Forest</b>      |                                                         |                                                                                                  |                                                                             |                  |                                                      |
| 21                 | (Hauck, Schmidt, & Werner, 2016)                        | Stakeholders relevant in agricultural biodiversity governance                                    | Agricultural landscapes                                                     | Germany          | E&S                                                  |
| 22                 | (Lamb et al., 2016)                                     | Use of social networks in development of conservation agricultural production systems            | Mt Elgon region                                                             | Kenya and Uganda | International Journal of Agricultural Sustainability |
| 23                 | (Hauck, Stein, Schiffer, & Vandewalle, 2015)            | Use of social networks maps to understand governance situations and identify strategies          | Biodiversity flows in Europe, Blue Nile and south east Asian mountain range | Europe, Ethiopia | Global Environmental Change                          |
| 24                 | (Prell et al., 2009)                                    | The effect of social networks ties on public satisfaction and agrarian communication networks.   | The Peak District National Park                                             | UK               | Society and Natural Resources                        |
| 25                 | (Ceddia, Christopoulos, Hernandez, & Zepharovich, 2017) | Use of SNA in the governance system of flood risk management                                     | Danube River and its catchment                                              | Austria          | Environmental Science and Policy                     |
| 26                 | (Bussmann et al., 2006)                                 | The role of close-knit community in passage of valuable cultural information from one generation | Maasai in the Sekenani Valley                                               | Kenya            | Journal of Ethnobiology and Ethnomedicine            |
| <b>Agriculture</b> |                                                         |                                                                                                  |                                                                             |                  |                                                      |
| 27                 | (García-Amado et al., 2012)                             | Evolution of coffee groups in a forest community                                                 | Coffee farmers in Chiapas                                                   | Mexico           | E&S                                                  |

|                        |                                                       |                                                                                                                |                                                                                                                                       |              |                                         |
|------------------------|-------------------------------------------------------|----------------------------------------------------------------------------------------------------------------|---------------------------------------------------------------------------------------------------------------------------------------|--------------|-----------------------------------------|
| 28                     | (Fischer & Eastwood, 2016)                            | Landscape planning prone to forest fires through formed social networks                                        | Eastern Cascades Ecoregion                                                                                                            | Oregon, USA  | Landscape and Urban Planning            |
| 29                     | (Yamaki, 2017)                                        | Relevant stakeholders in natural resources management                                                          | Natural resource management                                                                                                           | Japan        | Journal of Forest Research              |
| 30                     | (Schröter, Hauck, Hackenberg, & Matzdorf, 2018)       | Social networks in implementation of Payment for ecosystem services                                            | Mangroves and wetlands in Osa Peninsula in the pacific coast                                                                          | Costa Rica   | Ecosystem Services                      |
| 31                     | (de Blas, Ruiz-Pérez, & Vermeulen, 2011)              | Examination of community conflicts in the management of the community forests using social network aspects     | Community forests                                                                                                                     | Cameroon     | E&S                                     |
| 32                     | (Isaac, Anglaaere, Akoto, & Dawoe, 2014)              | Migrant farmers in a forest savanna region and their social formations                                         | Savanah semi-deciduous forest and guinea savannah vegetation                                                                          | Ghana        | E&S                                     |
| 33                     | (Knoot & Rickenbach, 2011)                            | Influence of land owners' social networks on forestry management decisions in Wisconsin                        | Wisconsin                                                                                                                             | USA          | Scandinavian Journal of Forest Research |
| 34                     | (Paletto, Balest, De Meo, Giacobelli, & Grilli, 2016) | Use of SNA to examine the real power in forest management                                                      | Valle di Non, in the Italian alps of Northern Italy                                                                                   | Italy Europe | Acta Silvatica et Lignaria Hungarica    |
| Other selected studies |                                                       |                                                                                                                |                                                                                                                                       |              |                                         |
| 35                     | Masterson et al. 2017)                                | How the sense of place perspective can contribute to social-ecological systems research                        | Review study<br>People-place relations strengthens the protective norms that are embedded in the social institutions for stewardship. |              | Ecology and Society                     |
| 36                     | (Hopkins, 2011)                                       | The role of individual positions in the network in learning and acquiring of traditional ecological knowledge. | Yucatec Maya in Tabi community,                                                                                                       | Mexico       | Field Methods                           |

|    |                      |                                                           |                                                                                                                                          |                             |
|----|----------------------|-----------------------------------------------------------|------------------------------------------------------------------------------------------------------------------------------------------|-----------------------------|
| 37 | Bodin and Crona 2009 | The role of social network in natural resource governance | Comprehensive review<br>Social networks influence the behaviour of the individuals towards the ecosystem's services usage and governance | Global Environmental Change |
|----|----------------------|-----------------------------------------------------------|------------------------------------------------------------------------------------------------------------------------------------------|-----------------------------|
